# Supplementary material for: Associations between health and sexual lifestyles in Britain: findings from the third National Survey of Sexual Attitudes and Lifestyles (Natsal-3)
Source: PubMed Central journal article supplement (PMC3898988; doi:10.1016/s0140-6736(13)62222-9), 2013-11-30
Supplement: mmc1.pdf [file mmc1.pdf]

# THE LANCET

## **Supplementary appendix**

This appendix formed part of the original submission and has been peer reviewed. We post it as supplied by the authors.

Supplement to: Field N, Mercer CH, Sonnenberg P, et al. Associations between health and sexual lifestyles in Britain: findings from the third National Survey of Sexual Attitudes and Lifestyles (Natsal-3). *Lancet* 2013; published online Nov 26. [http://dx.doi.org/10.1016/S0140-6736\(13\)62222-9](http://dx.doi.org/10.1016/S0140-6736(13)62222-9).

**Web appendix: Reporting of sexual response problems (men – erectile difficulties; women – vaginal dryness) lasting at least six months in the past year in relation to demographic and health characteristics of participants who reported at least one sexual partner in the past year**

|                                                               | Men   |             |                    |              |         | Women                      |       |             |                    |              |         |                            |
|---------------------------------------------------------------|-------|-------------|--------------------|--------------|---------|----------------------------|-------|-------------|--------------------|--------------|---------|----------------------------|
|                                                               | %     | 95% CI      | AOR <sup>1,2</sup> | 95% CI       | p value | Denominator <sup>3,4</sup> | %     | 95% CI      | AOR <sup>1,2</sup> | 95% CI       | p value | Denominator <sup>3,4</sup> |
| <b>All</b>                                                    | 8.2%  | (7.4-9.2)   | -                  | -            |         | 4830, 5964                 | 8.0%  | (7.2-8.9)   | -                  | -            |         | 6659, 5748                 |
| <b>DEMOGRAPHIC CHARACTERISTICS</b>                            |       |             |                    |              |         |                            |       |             |                    |              |         |                            |
| <b>Age-group</b>                                              |       |             |                    |              | <0.0001 |                            |       |             |                    |              | <0.0001 |                            |
| 16-24                                                         | 2.4%  | (1.6-3.5)   | 1.00               |              |         | 1275, 933                  | 2.9%  | (2.2-3.9)   | 1.00               |              |         | 1660, 922                  |
| 25-34                                                         | 3.7%  | (2.8-5.0)   | 1.89               | (1.10-3.26)  |         | 1374, 1236                 | 4.9%  | (4.0-6.1)   | 1.54               | (1.02-2.32)  |         | 2234, 1245                 |
| 35-44                                                         | 4.0%  | (2.7-6.0)   | 2.13               | (1.12-4.05)  |         | 718, 1297                  | 3.6%  | (2.5-5.0)   | 1.06               | (0.64-1.74)  |         | 1045, 1285                 |
| 45-54                                                         | 8.2%  | (6.2-10.8)  | 4.23               | (2.43-7.39)  |         | 630, 1186                  | 8.8%  | (6.9-11.1)  | 2.65               | (1.71-4.12)  |         | 870, 1186                  |
| 55-64                                                         | 17.9% | (14.6-21.8) | 9.70               | (5.59-16.82) |         | 510, 845                   | 22.1% | (18.7-25.9) | 7.57               | (4.93-11.64) |         | 569, 755                   |
| 65-74                                                         | 26.2% | (21.5-31.6) | 16.50              | (9.46-29.0)  |         | 323, 467                   | 15.9% | (11.9-20.9) | 4.87               | (2.92-8.14)  |         | 281, 355                   |
| <b>Relationship status</b>                                    |       |             |                    |              | 0.1234  |                            |       |             |                    |              | 0.0016  |                            |
| Living with a partner                                         | 9.1%  | (7.9-10.3)  | 1.00               |              |         | 2706, 4261                 | 9.3%  | (8.3-10.5)  | 1.00               |              |         | 3964, 4166                 |
| In a steady relationship, not cohabiting                      | 6.1%  | (4.6-8.1)   | 1.35               | (0.94-1.94)  |         | 946, 758                   | 5.9%  | (4.5-7.7)   | 1.07               | (0.77-1.49)  |         | 1358, 788                  |
| No steady relationship, previously cohabited                  | 9.4%  | (6.8-12.8)  | 1.19               | (0.79-1.79)  |         | 445, 387                   | 4.0%  | (2.8-5.8)   | 0.47               | (0.31-0.70)  |         | 749, 460                   |
| No steady relationship, never cohabited                       | 3.8%  | (2.6-5.7)   | 1.67               | (1.02-2.74)  |         | 724, 550                   | 2.1%  | (1.1-4.1)   | 0.64               | (0.31-1.30)  |         | 578, 329                   |
| <b>GENERAL HEALTH</b>                                         |       |             |                    |              |         |                            |       |             |                    |              |         |                            |
| <b>Self-reported general health status</b>                    |       |             |                    |              | <0.0001 |                            |       |             |                    |              | 0.0111  |                            |
| Very good                                                     | 5.5%  | (4.4-6.8)   | 1.00               |              |         | 2070, 2446                 | 6.8%  | (5.7-8.1)   | 1.00               |              |         | 2828, 2427                 |
| Good                                                          | 7.8%  | (6.5-9.2)   | 1.22               | (0.90-1.66)  |         | 2046, 2604                 | 7.3%  | (6.2-8.6)   | 0.98               | (0.75-1.29)  |         | 2846, 2417                 |
| Fair                                                          | 16.3% | (13.1-20.1) | 2.32               | (1.60-3.37)  |         | 578, 741                   | 12.9% | (10.3-16.0) | 1.57               | (1.12-2.20)  |         | 779, 708                   |
| Bad or very bad                                               | 18.8% | (12.4-27.4) | 2.30               | (1.30-4.07)  |         | 135, 171                   | 14.0% | (9.4-20.5)  | 1.57               | (0.94-2.64)  |         | 206, 195                   |
| <b>Long-standing illnesses or disability</b>                  |       |             |                    |              | 0.0019  |                            |       |             |                    |              | 0.0009  |                            |
| None                                                          | 6.0%  | (5.1-7.0)   | 1.00               |              |         | 3580, 4255                 | 6.0%  | (5.2-6.9)   | 1.00               |              |         | 4836, 4020                 |
| Non-limiting                                                  | 13.3% | (10.5-16.8) | 1.50               | (1.07-2.11)  |         | 607, 862                   | 12.9% | (10.3-15.9) | 1.70               | (1.25-2.30)  |         | 844, 797                   |
| Limiting                                                      | 14.5% | (11.8-17.8) | 1.65               | (1.20-2.26)  |         | 642, 846                   | 12.7% | (10.4-15.5) | 2.29               | (1.74-3.01)  |         | 978, 930                   |
| <b>Number of self-reported chronic conditions<sup>5</sup></b> |       |             |                    |              | <0.0001 |                            |       |             |                    |              | 0.0109  |                            |
| 0                                                             | 5.0%  | (4.2-6.0)   | 1.00               |              |         | 3447, 3985                 | 5.5%  | (4.7-6.4)   | 1.00               |              |         | 4352, 3531                 |
| 1                                                             | 12.1% | (10.0-14.6) | 1.63               | (1.19-2.22)  |         | 936, 1328                  | 11.1% | (9.2-13.3)  | 1.62               | (1.23-2.15)  |         | 1553, 1415                 |
| >=2                                                           | 20.1% | (16.3-24.5) | 2.18               | (1.52-3.11)  |         | 443, 647                   | 13.8% | (11.2-16.9) | 1.53               | (1.10-2.12)  |         | 751, 799                   |
| <b>Body mass index (BMI)</b>                                  |       |             |                    |              | 0.6876  |                            |       |             |                    |              | 0.1536  |                            |
| Normal: 18.5-25 kg/m <sup>2</sup>                             | 7.2%  | (6.0-8.7)   | 1.00               |              |         | 2148, 2363                 | 8.5%  | (7.3-9.8)   | 1.00               |              |         | 2769, 3342                 |
| Underweight: <18.5 kg/m <sup>2</sup>                          | 0.7%  | (0.1-4.6)   | -                  | -            |         | 78, 67                     | 4.8%  | (2.5-9.0)   | 1.01               | (0.49-2.10)  |         | 230, 149                   |
| Overweight: 25-30 kg/m <sup>2</sup>                           | 8.6%  | (7.2-10.3)  | 0.93               | (0.70-1.25)  |         | 1684, 2315                 | 8.8%  | (7.3-10.6)  | 0.79               | (0.60-1.04)  |         | 1616, 1501                 |
| Obese: 30-35 kg/m <sup>2</sup>                                | 11.3% | (8.7-14.7)  | 1.17               | (0.80-1.73)  |         | 579, 803                   | 8.6%  | (6.4-11.7)  | 0.78               | (0.54-1.14)  |         | 686, 656                   |
| Obese: >35 kg/m <sup>2</sup>                                  | 9.1%  | (5.6-14.6)  | 0.92               | (0.50-1.71)  |         | 178, 241                   | 6.2%  | (3.9-9.6)   | 0.56               | (0.33-0.95)  |         | 368, 334                   |



Associations between health and sexual lifestyles in Britain: findings from the third National Survey of Sexual Attitudes and Lifestyles (Natsal-3)

| Satisfied with sex life |       |             |      |             |            |       |             |      |             |            |  |
|-------------------------|-------|-------------|------|-------------|------------|-------|-------------|------|-------------|------------|--|
| No                      | 13.8% | (11.9-15.9) | 1.00 |             | 1533, 1944 | 13.7% | (12.0-15.7) | 1.00 |             | 2009, 1775 |  |
| Yes                     | 5.6%  | (4.7-6.6)   | 0.37 | (0.28-0.48) | 3297, 4020 | 5.5%  | (4.7-6.4)   | 0.34 | (0.27-0.44) | 4648, 3972 |  |

<sup>1</sup> AOR=adjusted odds ratio.

<sup>2</sup> All models were adjusted for age and relationship status. Models investigating age and relationship status also adjusted for self-assessed general health status. Models investigating specific conditions were also adjusted for comorbidity, for which comorbidity was coded as 0=0–1 specific conditions and 1= $\geq$ 2 specific conditions.

<sup>3</sup> Shows unweighted and weighted denominators, which may vary across variables due to item non-response.

<sup>4</sup> Denominator is participants reporting one or more sexual partner in the past year.

<sup>5</sup> Measure of comorbidity and includes arthritis, heart attack, coronary heart disease, angina, other forms of heart disease, hypertension, stroke, diabetes, broken hip or pelvis bone or hip replacement ever, backache lasting longer than 3 months, any other muscle or bone disease lasting longer than 3 months, depression, cancer, and any thyroid condition treated in the past year.

<sup>6</sup> Heart attack, coronary heart disease, angina, other forms of heart disease, and stroke.

<sup>7</sup> Respondents were asked whether they had often been bothered by feeling down, depressed, or hopeless in the past 2 weeks, and whether they had often been bothered by little interest or pleasure in doing things in the past 2 weeks, with a validated two-question patient health questionnaire (PHQ-2).

<sup>8</sup> Women deemed to be postmenopausal when they had not menstruated in the past year, with analysis restricted to those aged 45–64 years.
